# Supplementary material for: Microbiota Composition in Upper Respiratory Tracts of Healthy Children in Shenzhen, China, Differed with Respiratory Sites and Ages
Source: Biomed Res Int. 2018 Jun 14;2018:6515670. doi: 10.1155/2018/6515670 (PMC6022278; doi:10.1155/2018/6515670)
Supplement: Supplementary 3 — Supplementary Figure 2: dissimilarity of bacterial community in ANs-NP and ANs-OP. The X-coordinate represents the 4 subgroups with different ages, and Y-coordinate stands for the dissimilarity of bacterial community. ∗∗∗ represents p-value ⩽ 0.001. [file 6515670.f3.xlsx]

## Sheet: Table Legends
Microbiota composition in upper respiratory tracts of healthy children in Shenzhen, China differed with respiratory sites and ages
Heping Wang1,#, Wenkui Dai2,#, Xin Feng3,#, Qian Zhou3, Hongmei Wang4, Yonghong Yang1, Shuaicheng Li2, Yuejie Zheng1,*
Supplementary Table 1	Sample information
Supplementary Table 2	Confounder analysis
Supplementary Table 3	Inter-group comparison at phylum level: NP-OP, ANs-OP, ANs-NP
Supplementary Table 4	Inter-group comparison of dominant genera: NP-OP, ANs-OP, ANs-NP
Supplementary Table 5	Comparison of dominant genera in OP among different ages

## Sheet: Supplementary Table 1
ID	Weight(kg)	Height(cm)	Gender	Age(year)	Delivery mode	Feed pattern	Living environment
T001	12.5	90	Female	2.9	Cesarean section	Breast feed	Urban
T002	16.1	107.3	Female	5.2	Premature birth	Breast+Milk feed	Suburb
T003	16.6	105	Male	3.2	Vaginally born	Breast+Milk feed	Suburb
T004	21.4	124.4	Male	7.6	Vaginally born	Breast+Milk feed	Urban
T005	8.81	80.5	Male	1.7	Vaginally born	Milk feed	Urban
T006	15.9	98	Female	3.9	Vaginally born	Milk feed	Urban
T008	13.72	88	Male	1.4	Vaginally born	Milk feed	Urban
T009	11	85.5	Female	1.5	Vaginally born	Milk feed	Suburb
T010	21.51	119.6	Male	6.9	Vaginally born	Breast feed	Urban
T011	13.6	90	Female	2.9	Cesarean section	Breast feed	Rural
T012	14.8	94.5	Male	2.9	Cesarean section	Breast+Milk feed	Urban
T013	17.5	105	Female	4.5	Vaginally born	Milk feed	Suburb
T014	27.5	136	Female	8.8	Cesarean section	Breast+Milk feed	Suburb
T015	10.8	79	Male	1.5	Vaginally born	Breast+Milk feed	Rural
T017	16.9	107.8	Female	5.1	Vaginally born	Breast+Milk feed	Rural
T018	15.2	99	Male	3.5	Vaginally born	Milk feed	Urban
T019	10.9	81.5	Male	1.5	Cesarean section	Breast feed	Urban
T020	30	131.1	Female	8.9	Cesarean section	Breast feed	Suburb
T021	10.1	85	Male	1.3	Vaginally born	Breast feed	Rural
T022	14.51	96	Male	2.7	Vaginally born	Breast feed	Rural
T023	16.3	103	Male	4.3	Vaginally born	Breast+Milk feed	Urban
T024	12.3	89	Male	1.8	Cesarean section	Breast feed	Urban
T025	13.9	93	Female	3.4	Vaginally born	Milk feed	Suburb
T026	11.4	80	Male	1.6	Vaginally born	Milk feed	Suburb
T028	10.3	83	Female	0.4	Cesarean section	Milk feed	Suburb
T029	6.7	60	Male	1.6	Cesarean section	Breast feed	Urban
T030	21.5	99.8	Female	2.9	Cesarean section	Breast+Milk feed	Rural
T031	16.8	102	Male	2.5	Cesarean section	Breast+Milk feed	Suburb
T032	21.8	115.2	Male	5.6	Vaginally born	Breast feed	Urban
T033	17.5	106.5	Male	4.9	Vaginally born	Breast feed	Suburb
T034	16	96.5	Male	8.2	Vaginally born	Breast+Milk feed	Suburb
T035	33	131.9	Female	3.2	Vaginally born	Breast feed	Suburb
T036	27	129.7	Female	10.8	Cesarean section	Breast feed	Suburb
T037	26.4	133.9	Male	9.5	Vaginally born	Breast feed	Suburb
T038	38.1	137.5	Male	9	Vaginally born	Milk feed	Urban
T039	25.6	130.1	Female	9	Vaginally born	Breast feed	Rural
T040	9.1	78	Female	1	Premature birth	Breast feed	Urban
T041	18.1	123.8	Female	7.3	Vaginally born	Milk feed	Urban
T042	20.6	130	Female	7.8	Vaginally born	Breast feed	Urban
T043	7.41	67	Female	0.4	Vaginally born	Breast feed	Urban
T044	20.9	115.4	Female	6.8	Cesarean section	Breast feed	Rural
T045	16.6	97	Female	2.8	Cesarean section	Breast+Milk feed	Urban
T046	13.7	97	Male	3.8	Vaginally born	Breast feed	Urban
T047	9.88	80	Female	1.1	Vaginally born	Breast+Milk feed	Suburb
T048	9.43	78	Female	1	Vaginally born	Breast feed	Urban
T049	7.86	67	Male	0.5	Vaginally born	Breast+Milk feed	Suburb
T050	8.55	76	Female	1.2	Vaginally born	Breast+Milk feed	Urban
T051	14.6	105	Female	4.3	Cesarean section	Breast feed	Urban
T052	38.2	140.6	Male	9.9	Cesarean section	Breast feed	Rural
T053	24.9	120.8	Female	7.2	Vaginally born	Breast+Milk feed	Urban
T054	19.8	116.6	Female	6.8	Cesarean section	Breast+Milk feed	Rural
T055	8.8	73	Female	0.5	Vaginally born	Breast+Milk feed	Urban
T056	24	128	Male	7.8	Vaginally born	Breast+Milk feed	Suburb
T057	8.4	62	Male	0.6	Vaginally born	Breast+Milk feed	Urban
T058	24	120	Female	7	Vaginally born	Breast+Milk feed	Urban
T059	12	85.5	Male	1.7	Vaginally born	Breast+Milk feed	Suburb
T060	16.5	100.5	Male	3.9	Vaginally born	Breast feed	Suburb
T061	10.8	79	Female	1.1	Cesarean section	Breast+Milk feed	Rural
T063	14.7	92	Male	2.4	Vaginally born	Breast feed	Suburb
T064	7.2	68	Female	0.7	Vaginally born	Breast+Milk feed	Rural
T065	12	87	Male	1.8	Vaginally born	Breast+Milk feed	Rural
T066	8.9	66	Male	0.6	Premature birth	Breast feed	Suburb
T068	9.6	76	Male	0.7	Premature birth	Breast+Milk feed	Urban
W002	32	108	Female	3.9	Premature birth	Breast feed	Suburb
W004	17.5	102	Female	4.5	Cesarean section	Breast+Milk feed	Urban
W006	16	102	Female	4.3	Vaginally born	Breast+Milk feed	Urban
W007	15.5	103	Male	3.9	Cesarean section	Breast+Milk feed	Urban
W009	32	120	Male	6.4	Cesarean section	Milk feed	Urban
W010	20.3	132	Female	8.1	Vaginally born	Breast+Milk feed	Urban
W013	20.8	110	Female	5	Cesarean section	Milk feed	Suburb
W014	14.5	103.5	Male	4	Cesarean section	Breast feed	Suburb
W015	20	112	Male	4.7	Cesarean section	Breast feed	Suburb
W017	17	105	Female	4.4	Cesarean section	Breast+Milk feed	Urban
W019	21	110	Male	5.6	Vaginally born	Breast+Milk feed	Suburb
W022	15.3	102	Male	3.8	Premature birth	Breast+Milk feed	Rural
W023	16	100	Female	6.1	Vaginally born	Breast+Milk feed	Suburb
W026	8.03	65	Male	0.5	Vaginally born	Breast+Milk feed	Urban
W028	23	130	Male	7.7	Cesarean section	Breast+Milk feed	Suburb
W029	22.5	124	Male	7.3	Vaginally born	Breast+Milk feed	Suburb
W039	28.1	140	Female	8.8	Vaginally born	Breast+Milk feed	Suburb
W040	28	132	Female	8.8	Vaginally born	Breast+Milk feed	Suburb
W041	38	113	Male	5.1	Vaginally born	Breast feed	Urban
W043	9.82	80	Male	1.2	Vaginally born	Breast+Milk feed	Urban
W044	8.4	78	Female	1	Vaginally born	Breast feed	Suburb
W048	8.3	67.3	Male	0.6	Vaginally born	Breast+Milk feed	Urban
W049	14	98	Female	3	Vaginally born	Breast+Milk feed	Rural
W050	6	58.5	Male	0.1	Vaginally born	Breast+Milk feed	Urban
W054	7.62	69	Female	0.4	Vaginally born	Breast+Milk feed	Rural
W055	3.45	50	Female	0.3	Vaginally born	Breast+Milk feed	Urban
W057	8.2	72	Female	0.4	Vaginally born	Breast+Milk feed	Rural
W059	5.8	56	Male	0.2	Vaginally born	Breast+Milk feed	Rural
W060	3.6	53	Female	0.3	Vaginally born	Breast+Milk feed	Suburb
W061	8.8	76	Female	0.4	Vaginally born	Breast+Milk feed	Urban
W065	22	90	Female	2.6	Vaginally born	Breast+Milk feed	Urban
W067	8.3	67	Male	0.6	Cesarean section	Breast+Milk feed	Suburb
W071	13.8	89	Female	2.8	Cesarean section	Breast+Milk feed	Suburb
W072	20	88	Female	2.4	Vaginally born	Breast+Milk feed	Urban
W074	11.21	81	Male	1.7	Cesarean section	Breast+Milk feed	Suburb

## Sheet: Supplementary Table 2
	ANs	NP	OP
Age	0.003 **	0.013 *	0.001 ***
Delivery mode	0.097	0.253	0.097
Feed pattern	0.088	0.758	0.048 *
Gender	0.915	0.162	0.03 *
Height	0.219	0.182	0.054
Weight	0.965	0.909	0.31
Living environment	0.357	0.552	0.288

## Sheet: Supplementary Table 3
Phylum	NP		OP		q-value
	Mean	SD	Mean	SD
Firmicutes	43.2369	30.5965	44.7397	20.0531	0.286706
Proteobacteria	31.4191	31.6672	19.7813	18.4034	0.0934933
Actinobacteria	12.4497	17.5246	7.85049	6.5894	0.18216
Bacteroidetes	7.67438	11.2541	20.5187	14.6292	4.63942e-08
Fusobacteria	4.05353	10.0465	6.66761	7.13094	2.17977e-05
Spirochaetes	0.535702	3.88092	0.0168682	0.0564774	0.60009
Unclassified	0.31405	0.557148	0.0103978	0.0339575	3.34632e-19
Candidatus_Saccharibacteria	0.091402	0.158674	0.296981	0.40671	4.36321e-05
Deinococcus_Thermus	0.0529097	0.131975	0.000102134	0.000786643	1.13599e-19
Acidobacteria	0.052509	0.151364	0.00127319	0.00701974	1.8786e-09
Tenericutes	0.0428081	0.229081	0.000553536	0.00280475	0.000262162
SR1	0.0268861	0.0797252	0.114552	0.476515	0.0274319
Verrucomicrobia	0.0159729	0.0323208	0.000466155	0.00377512	4.81065e-09
Chloroflexi	0.013028	0.0354928	4.8371e-05	0.0004764	5.82712e-06
Nitrospirae	0.0068143	0.032272	0.000133794	0.00104219	0.00191241
Chlamydiae	0.00476933	0.0246638	0	0	0.003557
Synergistetes	0.00240435	0.00688904	0.000718392	0.00707534	0.00165098
Thermotogae	0.00187525	0.0130934	0	0	0.0458822
Gemmatimonadetes	0.00143935	0.00425151	6.5742e-05	0.000647486	0.00653721
Latescibacteria	0.00119073	0.00620655	0	0	0.0458822
Ignavibacteriae	0.000715583	0.00425136	0	0	0.0934933
Hydrogenedentes	0.0006462	0.00466401	0	0	0.0934933
Planctomycetes	0.0004716	0.00258191	0	0	0.0934933
Lentisphaerae	0.000408033	0.00205292	7.5619e-05	0.000744756	0.159155
candidate_division_WPS	0.000154633	0.00119779	0	0	0.224917
Armatimonadetes	0.000146817	0.00113724	0	0	0.224917
Parcubacteria	0.000116417	0.000654156	0	0	0.0934933
Phylum	ANs		OP		q-value
	Mean	SD	Mean	SD
Firmicutes	39.5747	19.2708	44.7397	20.0531	0.177659
Actinobacteria	27.1063	19.8971	7.85049	6.5894	8.10929e-12
Proteobacteria	26.888	27.4313	19.7813	18.4034	0.23606
Bacteroidetes	4.14824	5.97357	20.5187	14.6292	9.03631e-15
Fusobacteria	1.35246	2.71901	6.66761	7.13094	3.13822e-10
Unclassified	0.628625	3.56235	0.0103978	0.0339575	6.47117e-19
Candidatus_Saccharibacteria	0.0943631	0.152235	0.296981	0.40671	0.000125361
Deinococcus_Thermus	0.0843717	0.221605	0.000102134	0.000786643	2.10304e-22
SR1	0.0393813	0.10726	0.114552	0.476515	0.44039
Verrucomicrobia	0.0192733	0.130268	0.000466155	0.00377512	1.06207e-05
Acidobacteria	0.0191147	0.0977119	0.00127319	0.00701974	5.16312e-10
Spirochaetes	0.0130106	0.0470968	0.0168682	0.0564774	0.678562
Chloroflexi	0.00899768	0.0423628	4.8371e-05	0.0004764	3.21046e-07
Nitrospirae	0.00698024	0.0458206	0.000133794	0.00104219	0.00546683
Tenericutes	0.00631134	0.0348352	0.000553536	0.00280475	0.0456146
Thermotogae	0.00303075	0.0253473	0	0	0.0994607
Gemmatimonadetes	0.00161736	0.0101357	6.5742e-05	0.000647486	0.0994607
Synergistetes	0.00144113	0.0106346	0.000718392	0.00707534	0.0994607
Latescibacteria	0.00104798	0.00897112	0	0	0.0994607
Ignavibacteriae	0.000792422	0.0058998	0	0	0.0994607
Lentisphaerae	0.000482735	0.00247093	7.5619e-05	0.000744756	0.0994607
Armatimonadetes	0.000303012	0.00251295	0	0	0.15612
Planctomycetes	0.000289325	0.001551	0	0	0.0994607
candidate_division_WPS	0.000228072	0.00163143	0	0	0.15612
Hydrogenedentes	0.000212831	0.00137862	0	0	0.15612
Parcubacteria	0.000202687	0.00184656	0	0	0.307434
Elusimicrobia	0.000119181	0.000763381	0	0	0.15612
Phylum	ANs		NP		q-value
	Mean	SD	Mean	SD
Firmicutes	39.5747	19.2708	43.2369	30.5965	0.98205
Actinobacteria	27.1063	19.8971	12.4497	17.5246	2.31958e-06
Proteobacteria	26.888	27.4313	31.4191	31.6672	0.896768
Bacteroidetes	4.14824	5.97357	7.67438	11.2541	0.603723
Fusobacteria	1.35246	2.71901	4.05353	10.0465	0.98205
Unclassified	0.628625	3.56235	0.31405	0.557148	0.686128
Candidatus_Saccharibacteria	0.0943631	0.152235	0.091402	0.158674	0.243261
Deinococcus_Thermus	0.0843717	0.221605	0.0529097	0.131975	0.642704
SR1	0.0393813	0.10726	0.0268861	0.0797252	0.243261
Verrucomicrobia	0.0192733	0.130268	0.0159729	0.0323208	0.193096
Acidobacteria	0.0191147	0.0977119	0.052509	0.151364	0.814674
Spirochaetes	0.0130106	0.0470968	0.535702	3.88092	0.98205
Chloroflexi	0.00899768	0.0423628	0.013028	0.0354928	0.98205
Nitrospirae	0.00698024	0.0458206	0.0068143	0.032272	0.98205
Tenericutes	0.00631134	0.0348352	0.0428081	0.229081	0.316429
Thermotogae	0.00303075	0.0253473	0.00187525	0.0130934	0.98205
Gemmatimonadetes	0.00161736	0.0101357	0.00143935	0.00425151	0.642704
Synergistetes	0.00144113	0.0106346	0.00240435	0.00688904	0.309333
Latescibacteria	0.00104798	0.00897112	0.00119073	0.00620655	0.98205
Ignavibacteriae	0.000792422	0.0058998	0.000715583	0.00425136	0.98205
Lentisphaerae	0.000482735	0.00247093	0.000408033	0.00205292	0.98205
Armatimonadetes	0.000303012	0.00251295	0.000146817	0.00113724	0.98205
Planctomycetes	0.000289325	0.001551	0.0004716	0.00258191	0.98205
candidate_division_WPS	0.000228072	0.00163143	0.000154633	0.00119779	0.98205
Hydrogenedentes	0.000212831	0.00137862	0.0006462	0.00466401	0.98205
Parcubacteria	0.000202687	0.00184656	0.000116417	0.000654156	0.814674
Elusimicrobia	0.000119181	0.000763381	0	0	0.642704
Chlamydiae	0	0	0.00476933	0.0246638	0.0480209

## Sheet: Supplementary Table 4
	OP	KY	NP		ANs		NP-vs-OP	ANs-vs-OP	ANs-vs-NP
Genus	Mean	SD	Mean	SD	Mean	SD	q-value
Corynebacterium	0.123604	0.72361	10.8688	17.6413	24.616	20.6013	1.56085e-17	1.64005e-27	8.61612e-05
Dolosigranulum	0.0283571	0.180124	8.29736	12.2802	18.996	17.5398	2.11215e-16	8.42804e-24	0.00236358
Moraxella	0.415689	2.94273	19.237	29.1114	18.0445	26.37	1.22065e-08	3.64022e-14	0.792985
Streptococcus	28.4571	20.3465	10.5049	18.3308	8.50129	10.3994	5.49661e-12	2.13402e-16	0.45339
Staphylococcus	0.0545191	0.278751	16.6465	32.8474	6.99551	13.3308	1.05469e-20	9.96458e-24	0.45339
Neisseria	12.6339	13.6892	1.54456	3.17219	2.16227	4.69179	5.86758e-10	7.63706e-09	0.0624811
Prevotella	17.3524	15.0672	3.48438	6.02193	2.15701	3.3337	2.99964e-10	1.27376e-14	0.692911
Rothia	5.46281	6.38052	0.678381	1.70333	1.36786	2.26399	2.46394e-16	6.80423e-12	0.000941023
Haemophilus	6.16974	8.44666	3.27977	12.8165	1.32649	2.46794	7.33932e-07	6.61802e-08	0.45339
Veillonella	8.96069	8.50382	1.48382	2.94948	1.29956	1.93056	9.22534e-14	5.31364e-17	0.123126
Leptotrichia	4.38505	5.83527	0.496718	1.03661	0.765797	1.56195	1.12164e-08	5.11049e-08	0.0988379
Actinomyces	1.65069	1.7098	0.395826	0.90473	0.671445	0.943968	1.83221e-11	2.04485e-07	0.00744761
Granulicatella	2.35863	1.8482	0.77211	1.78942	0.665166	0.883437	1.13167e-10	4.66613e-12	0.00782661
Gemella	1.70924	2.05162	0.476253	1.14814	0.562312	0.992424	1.09445e-11	6.79319e-10	0.00782661
Fusobacterium	1.93569	2.82218	3.50025	9.98377	0.543402	1.27434	0.0291277	1.70497e-05	0.560814
Bacteroides	0.0752701	0.562262	1.47095	3.35238	0.518245	1.60056	9.81616e-19	5.64616e-15	0.00782661
Lactobacillus	1.08273	6.75337	0.416691	1.25181	0.437907	1.16931	1.45508e-08	1.01408e-06	0.216935
Porphyromonas	1.40942	1.95182	0.420594	0.825062	0.34272	0.622537	6.42897e-06	2.39269e-06	0.348321
Acinetobacter	0.0352653	0.314024	0.95056	1.69601	0.323644	0.57391	6.12769e-22	3.65827e-25	0.00805058
Atopobium	0.510984	0.87428	0.147641	0.59255	0.11683	0.31972	1.92865e-09	8.84695e-08	0.0674398
Massilia	8.9732e-05	0.000626569	1.57407	12.1721	0.00972782	0.0193029	0.000157924	2.19523e-16	0.000389456

## Sheet: Supplementary Table 5
	≤1(G1)		1<&≤3(G2)		>3(G3)		G1-vs-G2	G1-vs-G3	G2-vs-G3	Kruskal-Wallis test
Genus	Mean	SD	Mean	SD	Mean	SD	q-value
Streptococcus	52.6667	25.7478	25.6836	11.0168	19.4833	12.0434	0.00129649	3.59667e-06	0.1923	4.824e-07
Veillonella	10.3524	12.6235	8.605	7.56623	8.55896	6.77448	0.442583	0.545154	0.916932	0.5621
Rothia	9.69619	9.75984	4.42964	4.4672	4.21292	4.57231	0.391857	0.328651	0.831905	0.1847
Prevotella	9.2981	15.0046	14.4532	12.1108	22.5671	14.895	0.032533	0.000848744	0.300032	0.0001428
Neisseria	4.2119	9.23439	15.1464	15.8436	14.8525	12.7202	0.00035845	2.13033e-05	0.782799	2.839e-06
Lactobacillus	3.80952	14.2611	0.276429	1.13207	0.360208	1.28094	0.0496378	0.0287969	0.92285	0.008042
Granulicatella	1.89143	2.32025	3.23964	1.69145	2.04958	1.54385	0.0235464	0.545154	0.0983204	0.00189
Actinomyces	1.82952	2.58939	1.33821	0.915642	1.75479	1.59883	0.391857	0.475359	0.652762	0.2265
Leptotrichia	1.59476	4.08838	5.28643	6.13833	5.07937	6.02872	0.000156488	2.158e-05	0.919542	2.029e-06
Gemella	1.09905	1.531	2.63107	2.84512	1.43771	1.48417	0.00670223	0.144761	0.1923	0.0007148
Atopobium	0.791429	1.52018	0.308571	0.516905	0.506458	0.604724	0.641664	0.490148	0.479759	0.1046
Haemophilus	0.603333	1.16356	8.59536	9.60555	7.19021	8.58694	1.4445e-05	6.308e-07	0.652762	4.644e-09
Fusobacterium	0.368095	0.806521	1.77143	2.80009	2.71646	3.12406	0.000920773	6.4325e-06	0.570956	6.025e-07
Porphyromonas	0.288095	0.59673	2.15393	2.26014	1.46562	1.94971	9.737e-05	4.54316e-05	0.652762	1.103e-06
Eubacterium	0.237143	0.868718	0.367857	0.685686	0.344375	0.308282	0.00433923	4.26067e-05	0.652762	1.575e-05
Streptobacillus	0.122381	0.444048	0.491071	0.781401	0.247708	0.71287	0.000156488	0.0492739	0.0659851	8.084e-06
Moraxella	0.0866667	0.26932	0.0628571	0.191095	0.765	4.17069	0.127426	0.100262	0.831905	0.05548
